# Supplementary material for: A complete collection of single-gene deletion mutants of Acinetobacter baylyi ADP1
Source: PubMed Central journal article supplement — Mol Syst Biol. 2008 Mar 4;4:174. doi: 10.1038/msb.2008.10 (PMC2290942; doi:10.1038/msb.2008.10), 2008-03-04
Supplement: msb200810-s1.pdf [file msb200810-s1.pdf]

## Supplementary table of contents

**Supplementary Table I** Complete data set on the deletion mutants in the *Acinetobacter baylyi* ADP1 collection

**Supplementary Table II** Data set on the 121 “Double Band” mutants that have orthologues in *Escherichia coli* and *Pseudomonas aeruginosa*.

**Supplementary Annexe I** Double Bands (DB) mutants: essential or non essential genes?

**Supplementary Table III** Summary of gene essentiality data of *A. baylyi* ADP1 and mutant collections for other bacteria (*E. coli*, *P. aeruginosa*, *B. subtilis* and *C. glutamicum*).

**Supplementary Table IV:** Essential genes of *Acinetobacter baylyi* ADP1 described as non-essential in *Pseudomonas aeruginosa*.

**Supplementary Table V:** Orthologous genes of *Acinetobacter baylyi* ADP1 and *Escherichia coli* and their essentiality

**Supplementary Figure 1** First steps of ubiquinone biosynthesis. Essential genes are in red and dispensable genes are in green

**Supplementary Table VI** *Acinetobacter baylyi* ADP1 mutant growth yields on various carbon sources

**Supplementary Figure 2** Degradation pathways for aromatic compounds *via* protocatechuate in *Acinetobacter baylyi* ADP1

**Supplementary Annexe 2** Specificity and sensitivity of the growth phenotyping approach

**Supplementary Figure 3** Glucose assimilation pathway in *Acinetobacter baylyi* ADP1

**Supplementary Figure 4** Regions of *A. baylyi* ADP1 genome enriched in large size colonies. The relative size of mutant colonies, grown on solid media using several carbon sources, is reported according to the chromosomal location of their corresponding deleted gene.

**Supplementary Table VII** Primers used for the amplification of the genes involved in methionine biosynthesis

## Supplementary Annexe 1 : Double Band (DB) mutants: essential or non essential genes?

Out of the 206 DB mutants obtained, 121 have clear orthologues (Best Bidirectional Hit and same gene name) with *E. coli* and *P. aeruginosa* genes. Of them, 51 are described as essential in at least one of the following references in *E. coli* (Baba *et al.*, 2006; Gerdes *et al.*, 2003) and at least one of the following references in *P. aeruginosa* PA01 and PA14 (Jacobs *et al.*, 2003, Liberati *et al.*, 2006), 23 are described as essential in either all *E. coli* references or in all *P. aeruginosa* references. All the data on gene essentiality used above are inferred from mutant libraries obtained on a rich medium (i.e. LB) and no conditional essential genes (i.e. metabolic genes involved in biosynthesis of amino acids, cofactors, etc) are supposed to be present in these lists of essential genes. Our library was obtained on minimal medium and a number of the metabolic genes are supposed to be required for life under these conditions. Fortunately, mutants of the Keio collection were tested for growth on minimal medium resulting in conditional essential genes identification. Out the 46 remaining DB mutants, we have found 25 genes where the *E. coli* orthologue mutants are severely impaired for growth on minimal medium (OD <0.1). In addition, for the 22 remaining DB mutants, it should be noticed that some of them are described as essential in the literature (alanyl-tRNA synthetase, loss of function of *thiG*, *thiD* and *thiC* genes resulting respectively in thiazole, pyrimidine and thiamine auxotrophy). In some other cases, the discrepancies could result from the use of different experimental conditions or highlight metabolic differences between *E. coli* and *A. baylyi* ADP1. For example, (1) the gene *dctA* encodes an aerobic C4-dicarboxylate transport protein and is expected to be essential for growth with succinate as the sole carbon source, (2) three acetolactate synthase isozymes are present in *E. coli* K-12 while only one complex (*ilvH*, *ilvI*) seems to be present in *A. baylyi* ADP1. In total, 105 DB mutants (87%) show strong evidence for essentiality or conditional essentiality of the corresponding genes. Supplementary Table 2 shows information on the essentiality of the 121 genes including the 16 genes where no evidence for essentiality were found.

| Bacteria mutant collections                   | Number of essential genes | Orthologous genes in <i>Acinetobacter baylyi</i> ADP1 |                                    |                                  |                               |
|-----------------------------------------------|---------------------------|-------------------------------------------------------|------------------------------------|----------------------------------|-------------------------------|
|                                               |                           | Number of genes                                       | Essential in the compared bacteria | Essential also in <i>A. ADP1</i> | Dispensable in <i>A. ADP1</i> |
| <b><i>Escherichia coli</i></b>                |                           |                                                       |                                    |                                  |                               |
| Baba <i>et al.</i> , 2006 (Keio collection)   | 303                       | 1177                                                  | 213                                | 189 (89%)                        | 24                            |
| Gerdes <i>et al.</i> , 2003                   | 620                       | 1177                                                  | 285                                | 186 (65%)                        | 99                            |
| Hashimoto <i>et al.</i> , 2005 (PEC database) | 302                       | 1177                                                  | 186                                | 164 (88%)                        | 22                            |
| <b><i>Pseudomonas aeruginosa</i></b>          |                           |                                                       |                                    |                                  |                               |
| Liberati <i>et al.</i> , 2006                 | 335                       | 1655                                                  | 209                                | 167 (80%)                        | 42                            |
| Jacobs <i>et al.</i> , 2003                   | 678                       | 1655                                                  | 316                                | 215 (68%)                        | 101                           |
| <b><i>Bacillus subtilis</i></b>               |                           |                                                       |                                    |                                  |                               |
| Kobayashi <i>et al.</i> , 2003                | 271                       | 704                                                   | 172                                | 149 (87%)                        | 23                            |
| <b><i>Corynebacterium glutamicum</i></b>      |                           |                                                       |                                    |                                  |                               |
| Suzuki <i>et al.</i> , 2007                   | 658                       | 655                                                   | 208                                | 153 (71%)                        | 55                            |

**Supplementary Table III** Summary of gene essentiality data of *A. baylyi* ADP1 and others mutant collections (*E. coli*, *P. aeruginosa*, *B. subtilis* and *C. glutamicum*).

Column 1: name of bacterial mutant collection of the reference row bacteria

Column 2: number of essential genes according the reference cited in column 1

Column 3: number of orthologous genes between *A. baylyi* ADP1 and the reference row bacteria

Column 4: number of essential genes in the reference row bacteria having orthologues in *A. baylyi* ADP1 with essentiality data (dispensable/essential)

Column 5: number of essential genes (column 4) that is also essential in *A. baylyi* ADP1; the percentage of genes essential in both collections is noted between brackets

Column 6: number of essential genes (column 4) that is dispensable in *A. baylyi* ADP1



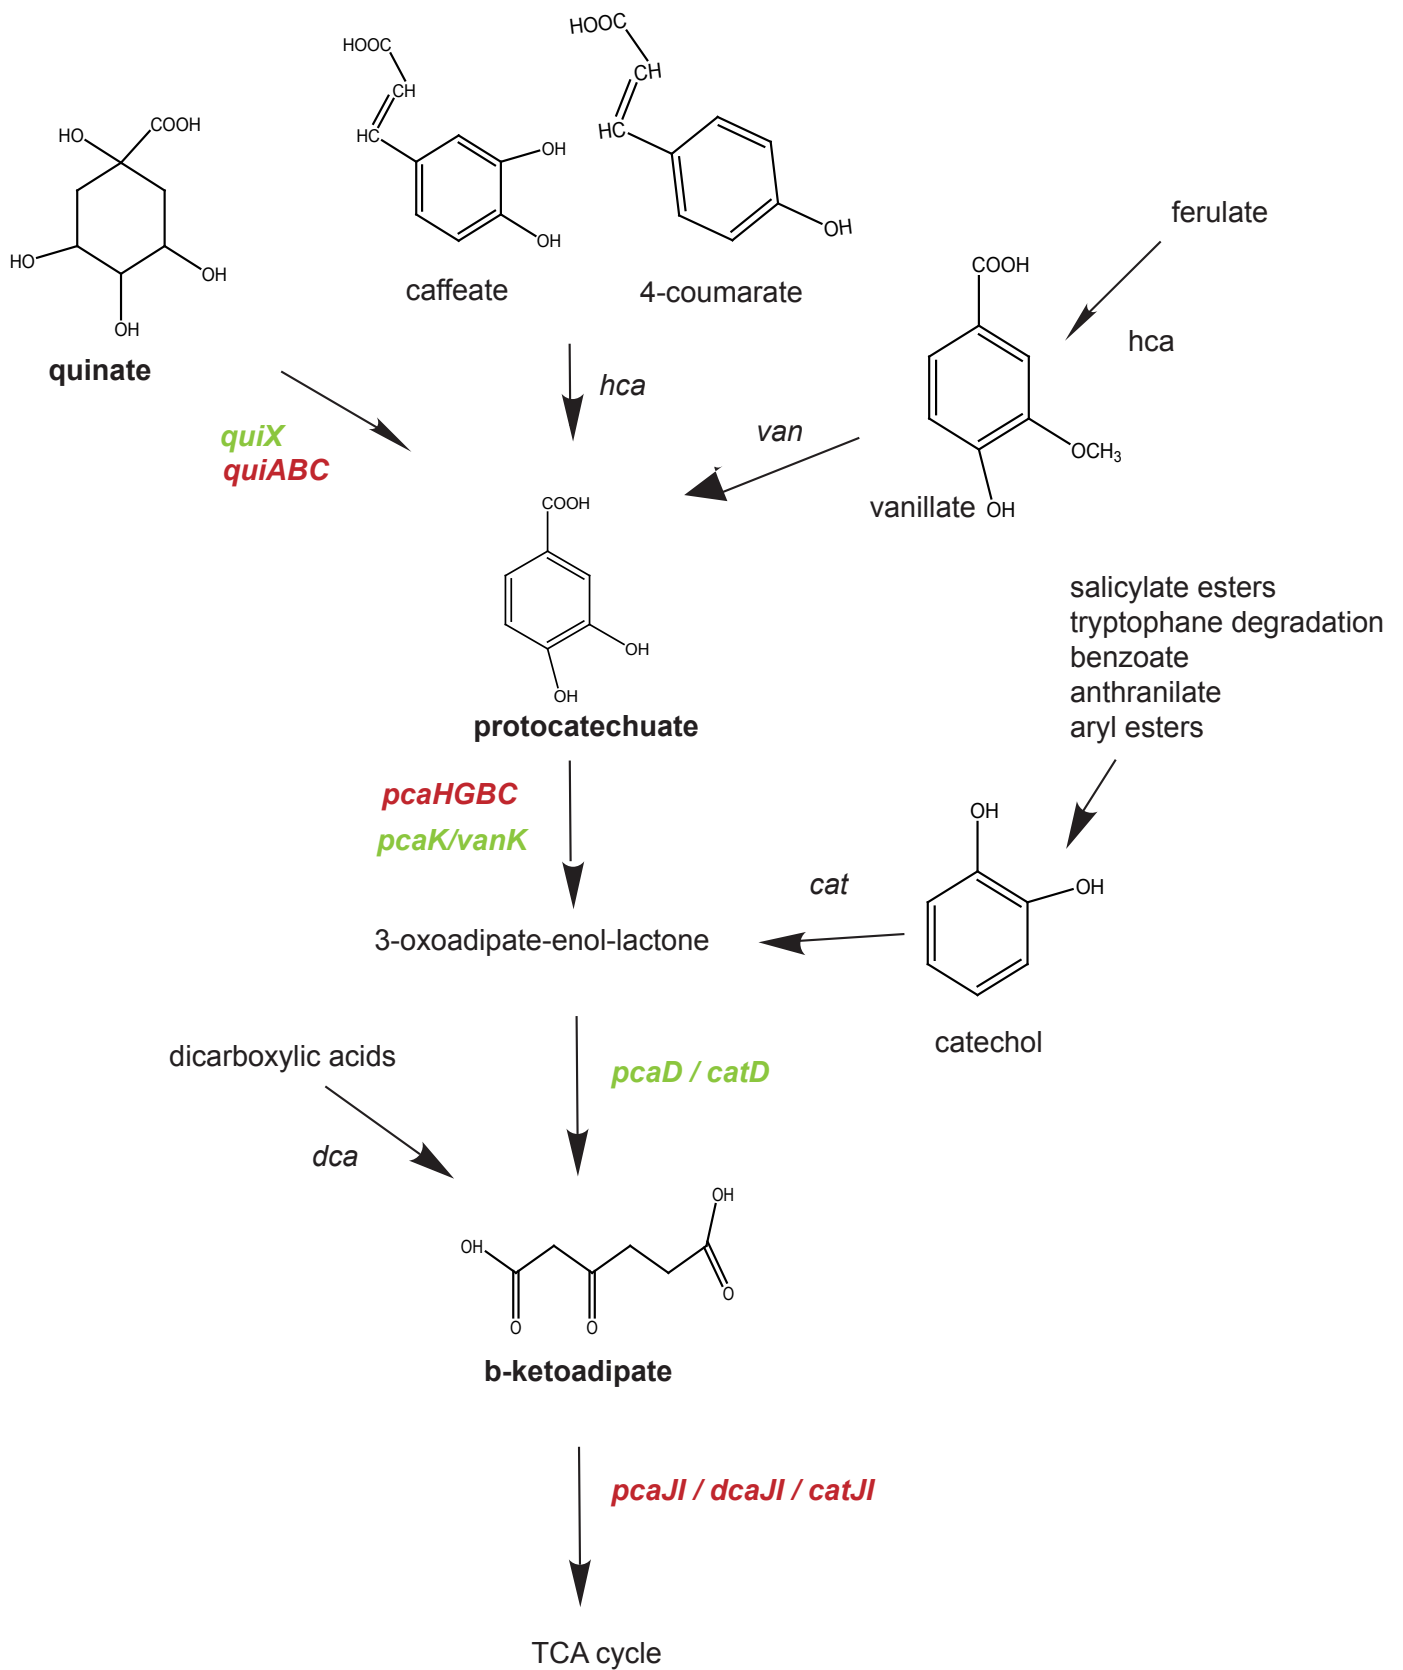

**Supplementary Figure 2** Degradation pathways for aromatic compounds via protocatechuate in *Acinetobacter baylyi* ADP1

## Supplementary Annexe 2 : Specificity and sensitivity of the growth phenotyping approach

### Quinate dissimilation

The quinate dissimilation, is composed of 13 genes corresponding to 10 enzymatic activities and two transporters (Supplementary Figure 2).

Our profiling for growth on quinate has shown the essentiality of (1) *quiA*, *quiB* and *quiC* which are involved in the three steps of degradation from quinate to protocatechuate. It should be notice that *quiB* is not complemented by *aroQ* even if these share to same enzymatic activity due to a different cellular localization (periplasm vs cytoplasm). (2) *pqqACDE* which are involved in pyrroloquinoline quinone (PQQ) biosynthesis confirming the requirement of PQQ cofactor for QuiA dehydrogenase activity (Elsemore and Ornston, 1994); (3) four genes of the *pca* operon (*pcaH*, *pcaG*, *pcaB* and *pcaC*) involved in the degradation of protocatechuate to 3-ketoadipate (4) three genes of the *pca* operon (*pcaI*, *pcaJ*, *pcaF*) involved in 3-ketoadipate degradation. The dispensability of (1) *quiX* (quinate porin) (Elsemore and Ornston, 1995); (2) *pcaD* which could be explained by the presence of *catD*; (3) *pcaK* for which an isofunctional genes *vanK* exist (D'Argenio *et al.*, 1999), (4) *pqqB* which was expected to be essential and is the only discrepancy we found in this degradation pathway.

### Glucose assimilation

The glucose dissimilation has been biochemically described by Juni, (1978) and during the genome annotation process genes have been associated with these enzymatic activities (Barbe *et al.*, 2004). This pathway involves two transporters (glucose and gluconate) and 5 genes corresponding to 5 enzymatic activities (Supplementary Figure 3).

Mutants were obtained for all of these and five of them (*edd*/ACIAD0542, *eda*/ACIAD0543, *gntT*/ACIAD0544, *gntK*/ACIAD0545, *gcd*/ACIAD2983) are unable to grow on glucose. The mutants of glucose porin (ACIAD2984, which flanks the glucose dehydrogenase gene) and the gluconolactonase gene are not impaired for growth on glucose. The glucose dehydrogenase (*gcd*) is PQQ-dependent and the five mutants of *pqq* genes, involved in the biosynthesis of PQQ are, as expected, unable to grow on glucose. Moreover the *gap*/ACIAD0546 is essential and further analyses are required to understand its role in glucose degradation.

## References

- Elsemore DA and Ornston LN (1994) The *pca-pob* supraoperonic cluster of *Acinetobacter calcoaceticus* contains *quiA*, the structural gene for quinate-shikimate dehydrogenase. *J Bacteriol* **176**: 7659-7666
- Elsemore DA and Ornston LN (1995) Unusual ancestry of dehydratases associated with quinate catabolism in *Acinetobacter calcoaceticus*. *J Bacteriol* **177**: 5971-5978
- Shanley MS, Harrison A, Parales RE, Kowalchuk G, Mitchell DJ, Ornston LN (1994) Unusual G + C content and codon usage in *catIJF*, a segment of the *ben-cat* supraoperonic cluster in the *Acinetobacter calcoaceticus* chromosome. *Gene* **138**: 59-65
- D'Argenio DA, Segura A, Coco WM, Bunz PV, Ornston LN (1999) The physiological contribution of *Acinetobacter pcaK*, a transporter system that acts upon protocatechuate, can be masked by overlapping specificity of *vanK*. *J Bacteriol* **181**: 3505-3515
- Juni E (1978) Genetics and physiology of *Acinetobacter*. *Annu Rev Microbiol* **32**: 349-371
- Barbe V, Vallenet D, Fonknechten N, Kreimeyer A, Oztas S, Labarre L, Cruveiller S, Robert C, Duprat S, Wincker P, Ornston LN, Weissenbach J, Marliere P, Cohen GN, Medigue C (2004) Unique features revealed by the genome sequence of *Acinetobacter sp.* ADP1, a versatile and naturally transformation competent bacterium. *Nucleic Acids Res* **32**: 5766-5779

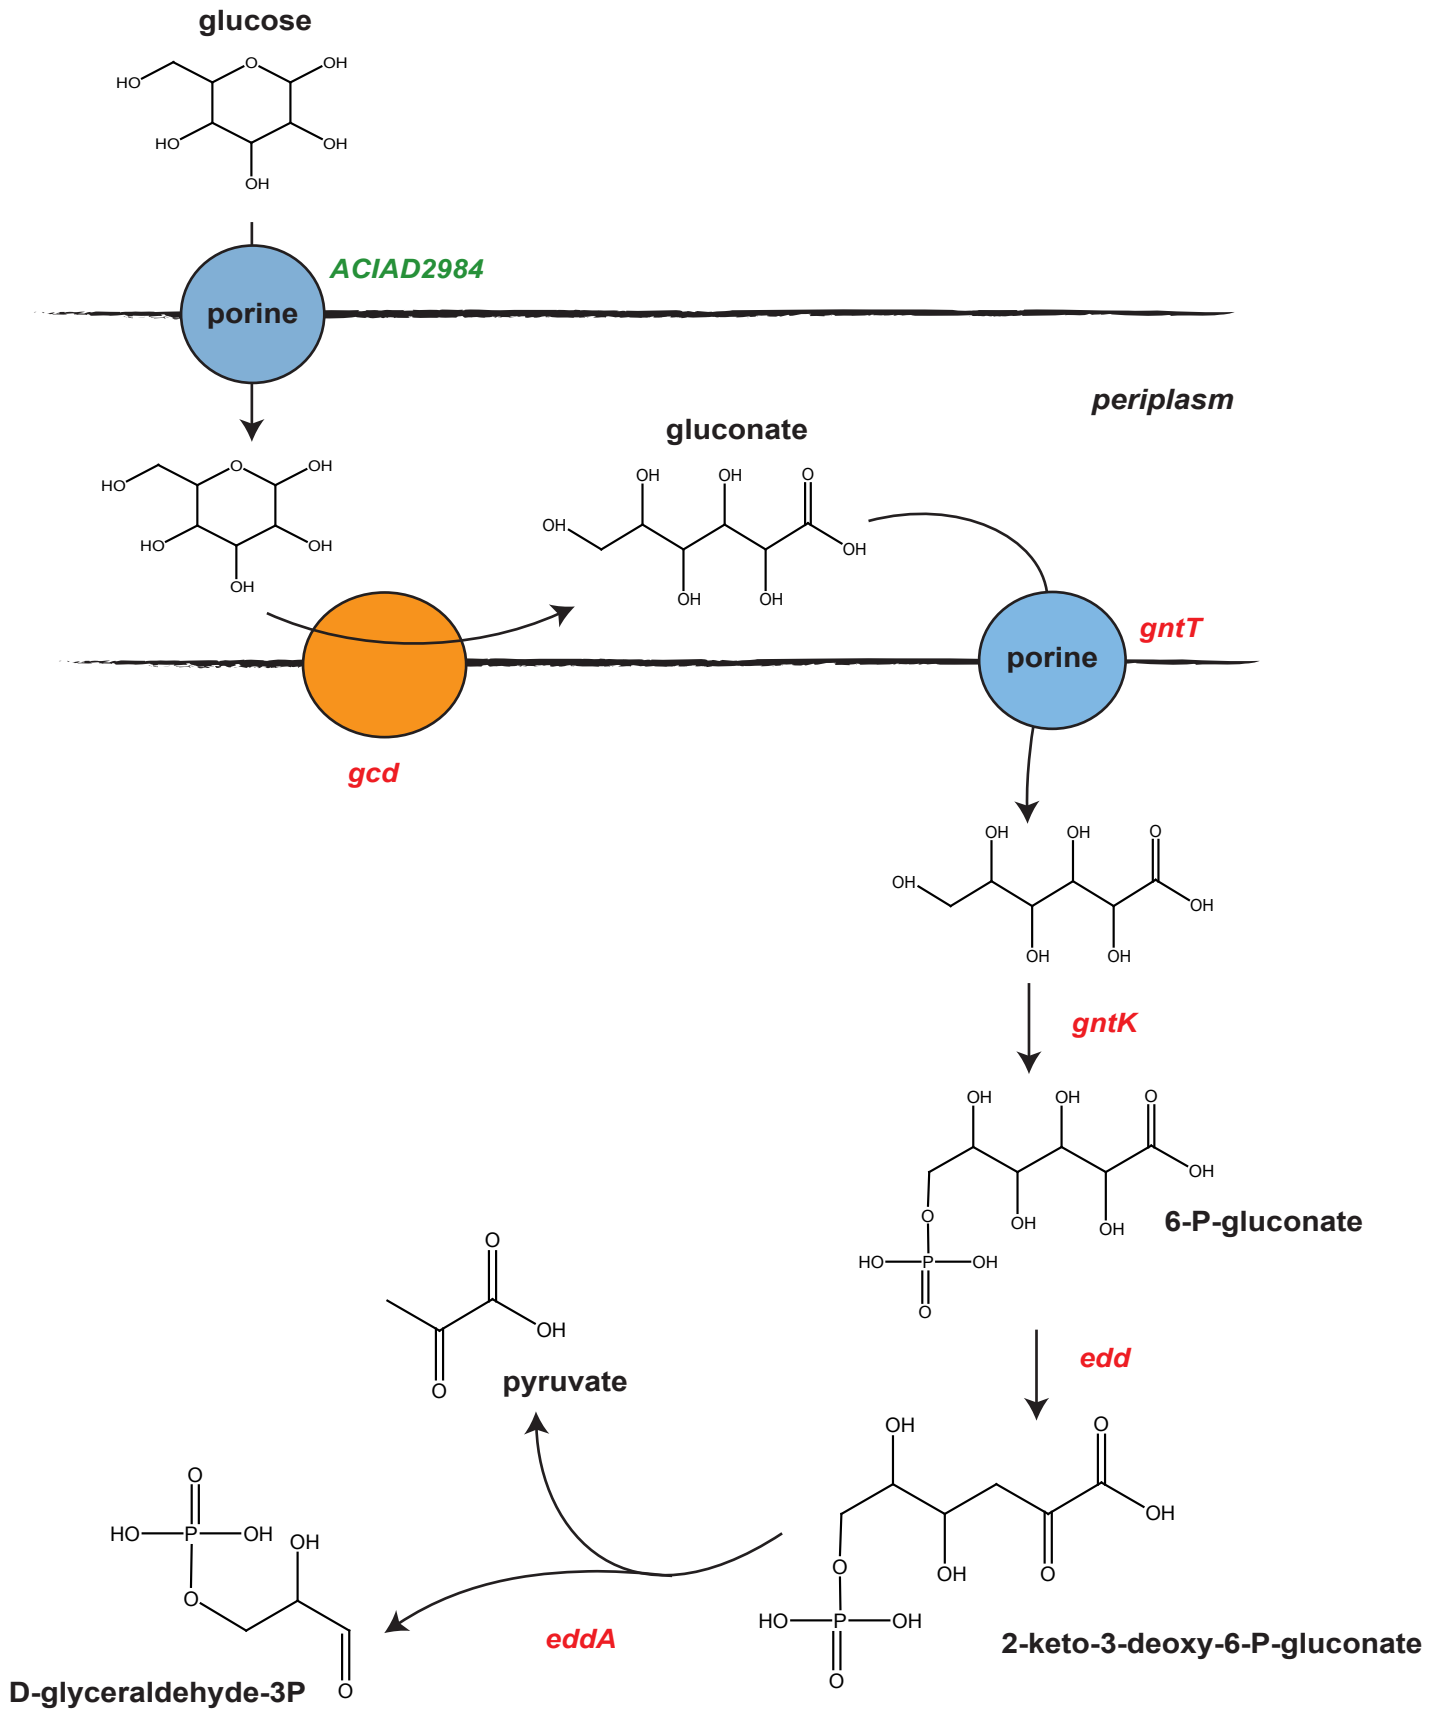

**Supplementary Figure 3** Glucose assimilation pathway in *Acinetobacter baylyi* ADP1



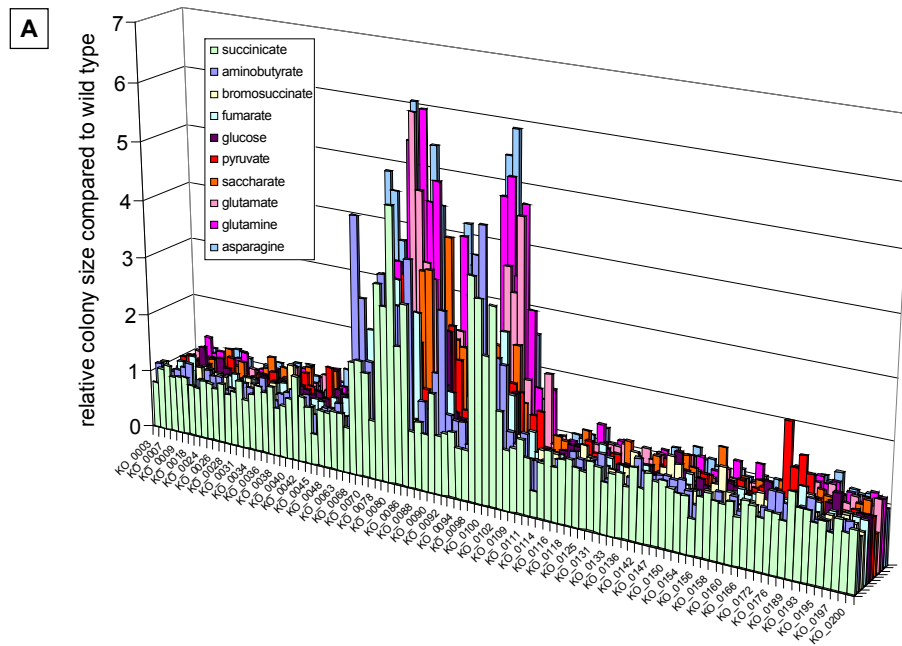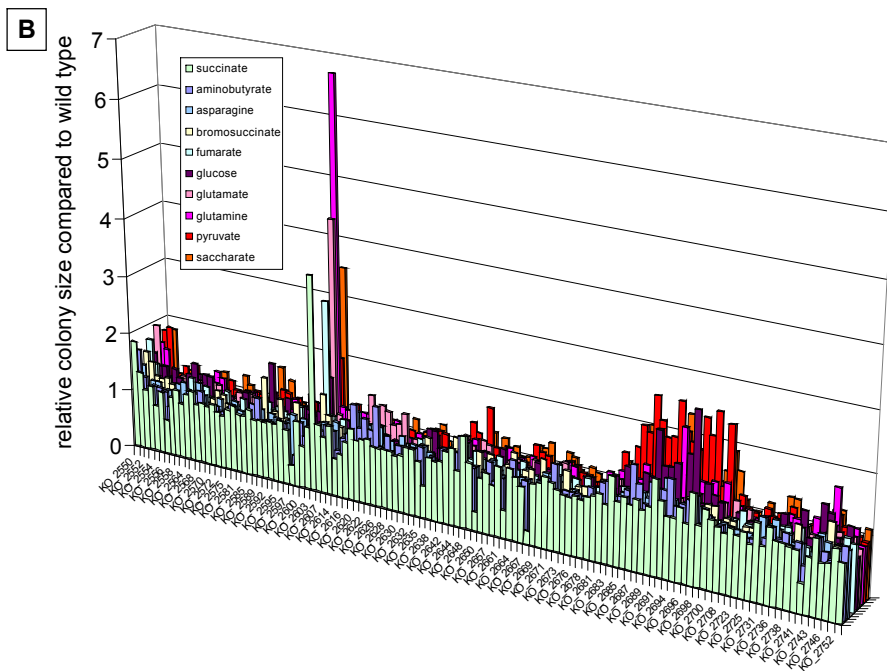

**Supplementary Figure 4** Regions of *A. baylyi* ADP1 genome enriched in large size colonies. The relative size of mutant colonies, grown on solid media using several carbon sources, is reported according to the chromosomal location of their corresponding deleted gene.

| Gene                   | Organisms      | Primer sequence                              |
|------------------------|----------------|----------------------------------------------|
| <i>metA</i> _PacI      | <i>E. coli</i> | 5-gggcctaattaaATGCCGATTCGTGTGCCGGACG         |
| <i>metA</i> _NotI      | <i>E. coli</i> | 5'-ataagaatcggccgcTTAATCCAGCGTTGGATTCATG     |
| <i>metX</i> _PacI      | ADP1           | 5-gggcctaattaaGTGTCTTTTCCATCTGACTCAGTGG      |
| <i>metX</i> _NotI      | ADP1           | 5'-ataagaatcggccgcTCAGTTGATCTCCACTTGAGG      |
| <i>metW</i> _PacI      | ADP1           | 5'-gggcctaattaaCTGATGCGTATTGACCAACAATTG      |
| <i>metW</i> _NotI      | ADP1           | 5'-ataagaatcggccgcTCATAGAGCGCTCACTCGG        |
| <i>metX/metW</i> _PacI | ADP1           | 5'-gggcctaattaaGTGTCTTTTCCATCTGACTCAGTGG     |
| <i>metX/metW</i> _NotI | ADP1           | 5'-ataagaatcggccgcTCATAGAGCGCTCACTCGG        |
| <i>metY</i> _PacI      | ADP1           | 5'-gggcctaattaaATGACTCATCGCTACAAAGATG        |
| <i>metY</i> _NotI      | ADP1           | 5'-ataagaatcggccgcTCAAAGTGGCCAATGCTTG        |
| <i>ACIAD3524</i> _PacI | ADP1           | 5'-gggcctaattaaTTGCGGTATAAATATCCCCATAGAG     |
| <i>ACIAD3524</i> _NotI | ADP1           | 5'-ataagaatcggccgcTTAAACAGCAGCACAGTTTTTTTCAG |

**Supplementary Table VII** Primers used for the amplification of the genes involved in methionine biosynthesis
